# Supplementary material for: Metabolic and vascular determinants of impaired cognitive performance and abnormalities on brain magnetic resonance imaging in patients with type 2 diabetes
Source: Springer Nature journal article supplement (doi:10.1007/s00125-007-0792-z), 2007-09-01
Supplement: MOESM1 [file 8087208]

## **Electronic supplementary material**

### **The Utrecht Diabetic Encephalopathy Study Group**

The group consists of:

University Medical Center, Utrecht, the Netherlands: Department of Clinical Neurophysiology: A. C. van Huffelen; Department of Internal Medicine: H. W. de Valk; Julius Center for Health Sciences and Primary Care: A. Algra, G. E. H. M. Rutten; Department of Medical Pharmacology: W. H. Gispen; Department of Neurology: A. Algra, G. J. Biessels, L. J. Kappelle, S. M. Manschot, J. van Gijn; Department of Neuropsychology and Helmholtz Research Institute: A. M. A. Brands (currently: Zuwe Hofpoort; Regionaal Psychiatrisch Centrum, Woerden, the Netherlands), E. H. F. de Haan, R. P. C. Kessels, E. van den Berg. Department of Radiology: J van der Grond (currently: Leiden University Medical Center, Leiden, the Netherlands); A. Tiehuis.

Patients were recruited through the community-based Utrecht Diabetes Programma (UDP) and the IJsselstein Diabetes Project (mentor: Ph. L. Salomé, general practitioner, 't Steyn, IJsselstein, the Netherlands). The UDP is a long-running collaborative project between general practitioners and a hospital-based endocrinologist, with the aim of improving the level of care for patients with type 2 diabetes in the community without referral to the hospital.
